# Supplementary material
Source: publisher site journal article supplement (https://www.dovepress.com/article/499248)
Supplement: Supplementary file 1 [file get_supplementary_file.php]

**Appendix S. Supplementary Data**

**Table S1: Complication-Defining Diagnosis Codes**

| **Code** | **Description** | **Coding System** |
| --- | --- | --- |
| 99600 | MALFUNC CARD DEV/GRF NOS | ICD9 |
| 99601 | MALFUNC CARDIAC PACEMAKE | ICD9 |
| 99604 | MCH CMP AUTM MPLNT DFBRL | ICD9 |
| 99609 | MALFUNC CARD DEV/GRF NEC | ICD9 |
| 99659 | MALFUNC OTH DEVICE/GRAFT | ICD9 |
| 99670 | COMP-UNSP DEVICE/GRAFT | ICD9 |
| 99672 | COMP-OTH CARDIAC DEVICE | ICD9 |
| T82110* | BREAKDOWN (MECHANICAL) OF CARDIAC ELECTRODE | ICD10 |
| T82111* | BREAKDOWN OF CARDIAC PULSE GENERATOR (BATTERY) | ICD10 |
| T82118* | BREAKDOWN (MECHANICAL) OF CARDIAC ELECTRONIC DEVICE | ICD10 |
| T82119* | BREAKDOWN OF UNSP CARDIAC ELECTRONIC DEVICE | ICD10 |
| T82120* | DISPLACEMENT OF CARDIAC ELECTRODE | ICD10 |
| T82121* | DISPLACEMENT OF CARDIAC PULSE GENERATOR (BATTERY) | ICD10 |
| T82128* | DISPLACEMENT OF OTHER CARDIAC ELECTRONIC DEVICE | ICD10 |
| T82129* | DISPLACEMENT OF UNSP CARDIAC ELECTRONIC DEVICE | ICD10 |
| T82190* | MECH COMPL OF CARDIAC ELECTRODE | ICD10 |
| T82191* | MECH COMPL OF CARDIAC PULSE GENERATOR (BATTERY) | ICD10 |
| T82198* | MECH COMPL OF OTHER CARDIAC ELECTRONIC DEVICE | ICD10 |
| T82199* | MECH COMPL OF UNSPECIFIED CARDIAC DEVICE | ICD10 |
| *Codes have a suffix of A,D, or S which denote initial encounter, subsequent encounter, and sequela respectively | | |

**Table S2: Complication-Defining Procedure Codes**

| **Code** | **Description** | **Coding System** |
| --- | --- | --- |
| 0052 | IMP/REP LEAD LF VEN SYS | ICD9 |
| 0053 | IMP/REP CRT PACEMAKR GEN | ICD9 |
| 0054 | IMP/REP CRT DEFIB GENAT | ICD9 |
| 3774 | INT OR REPL LEAD EPICAR | ICD9 |
| 3775 | REVISION OF LEAD | ICD9 |
| 3776 | REPL TV ATRI-VENT LEAD | ICD9 |
| 3777 | REMOVAL OF LEAD W/O REPL | ICD9 |
| 3779 | REV/RELOC CARD DEV POCKT | ICD9 |
| 3780 | INT OR REPL PERM PACEMKR | ICD9 |
| 3794 | IMPLT/REPL CARDDEFIB TOT | ICD9 |
| 3797 | REPL CARDIODEFIB LEADS | ICD9 |
| 3798 | REPL CARDIODEFIB GENRATR | ICD9 |
| 02PA0MZ | REMOVAL OF CARDIAC LEAD FROM HEART, OPEN APPROACH | ICD10 |
| 02PA3MZ | REMOVAL OF CARDIAC LEAD FROM HEART, PERCUTANEOUS APPROACH | ICD10 |
| 02PA4MZ | Removal of Cardiac Lead from Heart, Percutaneous Endoscopic Approach | ICD10 |
| 02PAXMZ | REMOVAL OF CARDIAC LEAD FROM HEART, EXTERNAL APPROACH | ICD10 |
| 02WA0MZ | REVISION OF CARDIAC LEAD IN HEART, OPEN APPROACH | ICD10 |
| 02WA3MZ | REVISION OF CARDIAC LEAD IN HEART, PERCUTANEOUS APPROACH | ICD10 |
| 02WA4MZ | Revision of Cardiac Lead in Heart, Percutaneous Endoscopic Approach | ICD10 |
| 02WAXMZ | Revision of Cardiac Lead in Heart, External Approach | ICD10 |
| 33206 | Insertion of new or replacement of permanent pacemaker with transvenous electrode(s); atrial | CPT |
| 33207 | Insertion of new or replacement of permanent pacemaker with transvenous electrode(s); ventricular | CPT |
| 33208 | Insertion of new or replacement of permanent pacemaker with transvenous electrode(s); atrial and ventricular | CPT |
| 33215 | repositioning of previously implanted transvenous pacemaker or implantable defibrillator (right atrial or right ventricular) electrode | CPT |
| 33218 | Repair of single transvenous electrode, permanent pacemaker or implantable defibrillator | CPT |
| 33220 | Repair of 2 transvenous electrodes for permanent pacemaker or implantable defibrillator | CPT |
| 33226 | Repositioning of previously implanted cardiac venous system (left ventricular) electrode (including removal, insertion, and/or replacement of existing generator) | CPT |
| 33227 | Removal of permanent pacemaker pulse generator with replacement of pacemaker pulse generator; single lead system | CPT |
| 33228 | Removal of permanent pacemaker pulse generator with replacement of pacemaker pulse generator; dual lead system | CPT |
| 33229 | Removal of permanent pacemaker pulse generator with replacement of pacemaker pulse generator; multiple lead system | CPT |
| 33234 | Removal of transvenous pacemaker electrode(s); single lead system, atrial or ventricular | CPT |
| 33235 | Removal of transvenous pacemaker electrode(s); dual lead system | CPT |
| 33236 | Removal of permanent epicardial pacemaker and electrodes by thoracotomy; single lead system, atrial or ventricular | CPT |
| 33238 | Removal of permanent transvenous electrode(s) by thoracotomy | CPT |
| 33243 | Removal of single or dual chamber implantable defibrillator electrode(s); by thoracotomy | CPT |
| 33244 | Removal of single or dual chamber implantable defibrillator electrode(s); by transvenous extraction | CPT |
| 33249 | Insertion or replacement of permanent implantable defibrillator system, with transvenous lead(s), single or dual chamber | CPT |
| 33270 | Insertion or replacement of permanent subcutaneous implantable defibrillator system, with subcutaneous electrode, including defibrillation thresh old evaluation, induction of arrhythmia, evaluation of sensing for arrhythmia termination, and programming or reprogramming of sensing or therapeutic parameters, when performed | CPT |
| 33272 | Removal of subcutaneous implantable defibrillator electrode | CPT |
| G0448 | Insertion or replacement of a permanent pacing cardioverter-defibrillator system with transvenous lead(s), single or dual chamber with insertion of pacing electrode, cardiac venous system, for left ventricular pacing | HCPCS |
